# Supplementary material
Source: MDPI journal article supplement (https://www.mdpi.com/2073-4433/10/7/352)
Supplement: s1 [file s1]

# Supplementary Material

## Correlations between PM<sub>2.5</sub> and Ozone over China and Associated Underlying Reasons

Jia Zhu <sup>1,2</sup>, Lei Chen <sup>1,3</sup>, Hong Liao <sup>1,\*</sup> and Ruijun Dang <sup>4</sup>

<sup>1</sup> Jiangsu Key Laboratory of Atmospheric Environment Monitoring and Pollution Control, Jiangsu Collaborative Innovation Center of Atmospheric Environment and Equipment Technology, School of Environmental Science and Engineering, Nanjing University of Information Science & Technology, Nanjing 210044, China; jiazhu@nuist.edu.cn (J.Z.); chenlei@nuist.edu.cn (L.C.)

<sup>2</sup> Research Institute of Climatic and Environmental Governance, Nanjing University of Information Science & Technology, Nanjing 210044, China

<sup>3</sup> Key Laboratory of Meteorological Disaster, Ministry of Education (KLME), Joint International Research Laboratory of Climate and Environment Change (ILCEC), Collaborative Innovation Center on Forecast and Evaluation of Meteorological Disasters (CIC-FEMD), Nanjing University of Information Science & Technology, Nanjing 210044, China

<sup>4</sup> University of Chinese Academy of Sciences, Beijing 100049, China; dangruijun@mail.iap.ac.cn

\* Correspondence: hongliao@nuist.edu.cn

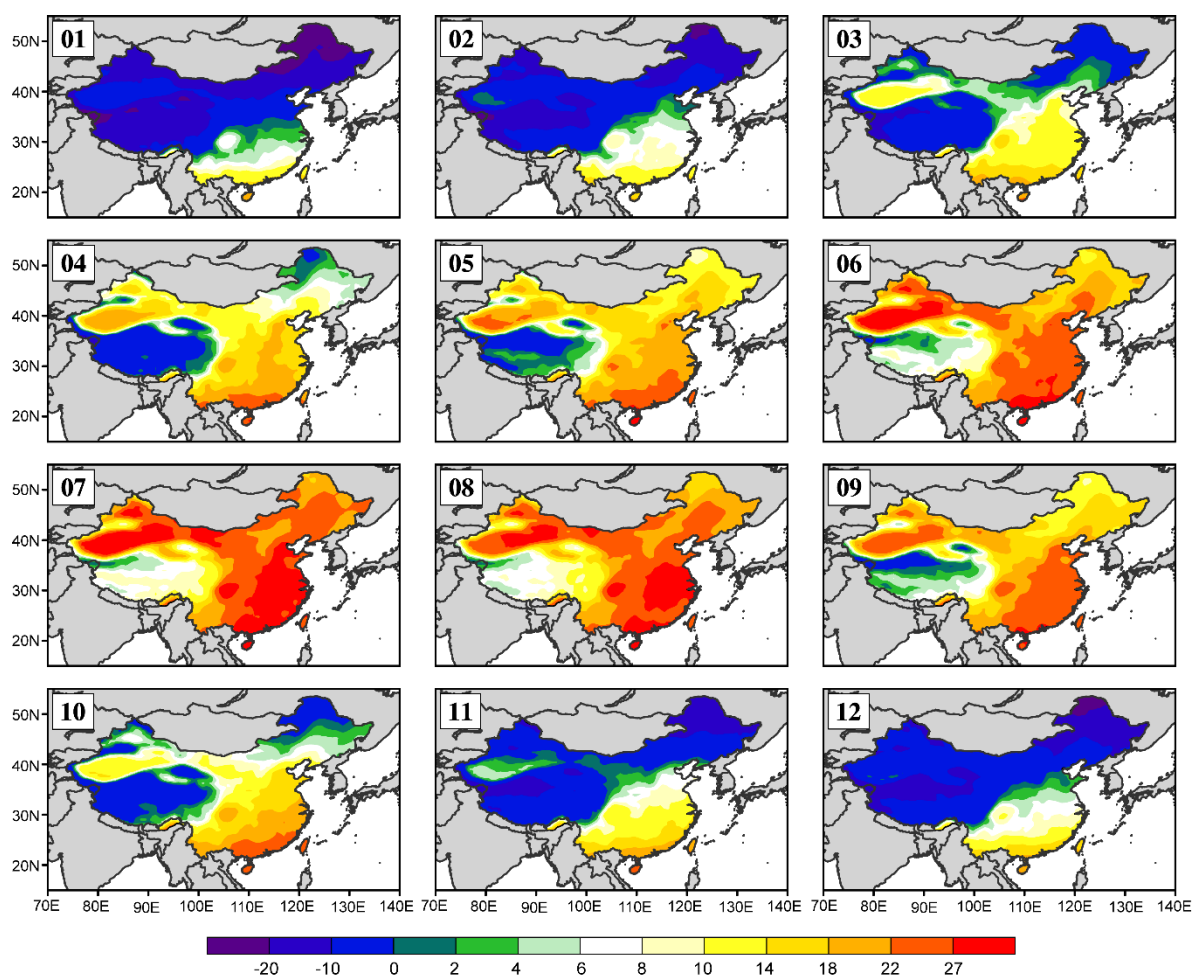

**Figure S1:** Spatial-temporal distributions of surface temperature (°C). Each panel represents each month for year 2016.
